# Supplementary material for: Combined Effects of Soil Silicon and Host Plant Resistance on Planthoppers, Blast and Bacterial Blight in Tropical Rice
Source: MDPI journal article supplement (doi:10.3390/insects13070604), 2022-07-01
Supplement: s1 [file s1]

## Supplementary Information

# Combined Effects of Soil Silicon and Host Plant Resistance on Planthoppers, Blast and Bacterial Blight in Tropical Rice

Quynh Vu<sup>1,2,3</sup>, Gerbert Sylvestre Dossa<sup>3</sup>, Enrique A. Mundaca<sup>4</sup>, Josef Settele<sup>2,5,6</sup>, Eduardo Crisol-Martínez<sup>4,7,8</sup>, Finbarr G. Horgan<sup>4,7,9</sup>\*

<sup>1</sup> Cuulong Delta Rice Research Institute, Tan Thanh, Thoi Lai District, Can Tho 905660, Vietnam

<sup>2</sup> Helmholtz Centre for Environmental Research – UFZ, Theodor-Lieser-Str. 4, 06120 Halle, Germany

<sup>3</sup> International Rice Research Institute, Makati 1226, Manila, Philippines

<sup>4</sup> Escuela de Agronomía, Facultad de Ciencias Agrarias y Forestales, Universidad Católica del Maule, Casilla 7-D, Curicó 3349001, Chile

<sup>5</sup> iDiv – German Centre for Integrative Biodiversity Research, Puschstrasse 4, 04103, Leipzig, Germany

<sup>6</sup> Institute of Biological Sciences, University of the Philippines (UPLB), 4031 Los Baños, Laguna, Philippines

<sup>7</sup> EcoLaVerna Integral Restoration Ecology, Bridestown, Kildinan, County Cork, T56 P499, Ireland

<sup>8</sup> Association of Fruit and Vegetable Growers of Almeria (COEXPHAL), Carretera de Ronda 11, 04004 Almeria, Spain

<sup>9</sup> Centre for Pesticide Suicide Prevention, University/BHF Centre for Cardiovascular Science, University of Edinburgh, Edinburgh EH16 4TJ, UK

**Table S1.** Details of experimental set-ups associated with the study.

| Silicon Levels<br>(t ha <sup>-1</sup> ) | Nitrogen<br>Levels (Kg ha <sup>-1</sup> ) | Rice Varieties <sup>1</sup>                                                     | Location    | Pest or<br>Pathogen <sup>2</sup> | Life Stage/<br>Pathotype | Bioassay                          | Plant Age at<br>First<br>Exposure to<br>Silicon <sup>3</sup> | Plant Age at<br>Infestation <sup>3</sup> | Plant Age at<br>Evaluation <sup>3</sup> | N <sup>4</sup> | Total Number<br>of Pots or<br>Arenas |
|-----------------------------------------|-------------------------------------------|---------------------------------------------------------------------------------|-------------|----------------------------------|--------------------------|-----------------------------------|--------------------------------------------------------------|------------------------------------------|-----------------------------------------|----------------|--------------------------------------|
| 0, 0.25, 1, 4                           | 0, 150                                    | IR22 (S), IR62 (R)                                                              | Philippines | BPH, WBPH, GLH                   | Nymph                    | Survival and weight gain          | 0 DAS                                                        | 20 DAS                                   | 35 DAS                                  | 6              | 288                                  |
| 0, 0.25, 1, 4                           | 0, 150                                    | IR22 (S), IR62 (R)                                                              | Philippines | BPH, WBPH, GLH                   | Nymph                    | Settling (choice)                 | 0 DAS                                                        | 20 DAS                                   | 25 DAS                                  | 6              | 18                                   |
| 0, 0.25, 1, 4                           | 0, 150                                    | IR22 (S), IR62 (R)                                                              | Philippines | BPH, WBPH                        | Adult female             | Oviposition                       | 0 DAS                                                        | 20 DAS                                   | 23 DAS                                  | 6              | 192                                  |
| 0, 0.25, 1, 4                           | 0, 150                                    | IR22 (S), IR62 (R)                                                              | Philippines | BPH, WBPH                        | Nymph                    | Oviposition (choice)              | 0 DAS                                                        | 20 DAS                                   | 23 DAS                                  | 6              | 12                                   |
| 0, 0.25, 1, 4                           | 0                                         | IR50404 (S)                                                                     | Vietnam     | BPH                              | Nymph                    | Survival and weight gain          | 0 DAS                                                        | 20 DAS                                   | 35 DAS                                  | 6              | 24                                   |
| 0, 0.25, 1, 4                           | 0                                         | IR50404 (S)                                                                     | Vietnam     | BPH                              | Adult female (unmated)   | Survival                          | 0 DAS                                                        | 30 DAS                                   | 35 DAS                                  | 6              | 24                                   |
| 0, 0.25, 1, 4                           | 0                                         | IR50404 (S)                                                                     | Vietnam     | BPH                              | Adult female (mated)     | Oviposition                       | 0 DAS                                                        | 20 DAS                                   | 23 DAS                                  | 6              | 24                                   |
| 0, 0.25, 1, 4                           | 0                                         | IR50404 (S)                                                                     | Vietnam     | BPH                              | Adult female (mated)     | Oviposition (choice)              | 0 DAS                                                        | 20 DAS                                   | 23 DAS                                  | 6              | 6                                    |
| 0, 0.25, 1, 4                           | 0                                         | IR22 (S), IR24 (S), CO39 (S), LTH (S), IRBL9-W (R), IRBLz5-Ca (R), IRBLz-Fu (R) | Philippines | Blast                            | M39-1-3-8-1              | Disease severity                  | 0 DAS                                                        | 14 DAS                                   | 21 DAS                                  | 3              | 84                                   |
| 0, 0.25, 1, 4                           | 0                                         | IR22 (S), IR24 (S), BB4 (R), BB7 (R), BB67 (R)                                  | Philippines | Bacterial blight                 | PXO99, PXO145            | Disease severity and plant weight | 0 DAS                                                        | 21, 45 DAS                               | 32 DAS, 59 DAS                          | 6              | 240                                  |
| 0, 0.25, 1, 4                           | 0, 150                                    | IR22 (S), IR62 (R)                                                              | Philippines |                                  |                          | Growth rates                      | 5 DAS                                                        | NA                                       | 35 DAT                                  | 6              | 96                                   |

<sup>1</sup>: R = resistant, S = susceptible; <sup>2</sup>: BPH = Brown Planthopper, WBPH = Whitebacked Planthopper, GLH = Green Leafhopper; <sup>3</sup>: DAS = Days after Sowing; DAT = Days after transplanting; NA = Not applicable; <sup>4</sup>: N = number of replicates

**Table S2.** Results from no-choice experiments conducted with brown planthopper in the Philippines. Numbers are means ± SEM.

| Variety                               | Nitrogen Level (Kg ha <sup>-1</sup> ) | Silicon Level (t ha <sup>-1</sup> ) | Survival (Proportion) | 2 <sup>nd</sup> Instars (Proportion) | 3 <sup>rd</sup> Instars (Proportion) | 4 <sup>th</sup> Instars (Proportion) | 5 <sup>th</sup> Instars (Proportion) | Development to Adult (Proportion) | Nymph Weight (mg) | Nymph DW per Plant DW <sup>2</sup> (mg g <sup>-1</sup> ) | Number of Eggs per Plant | Eggs per g Plant DW <sup>2</sup> |
|---------------------------------------|---------------------------------------|-------------------------------------|-----------------------|--------------------------------------|--------------------------------------|--------------------------------------|--------------------------------------|-----------------------------------|-------------------|----------------------------------------------------------|--------------------------|----------------------------------|
| IR22                                  | 0                                     | 0.00                                | 0.92±0.03             | 0.00±0.00                            | 0.00±0.00                            | 0.00±0.00                            | 0.04±0.04                            | 0.96±0.04                         | 9.43±1.18         | 16.48±2.54                                               | 171.67±21.24             | 218.68±45.60                     |
|                                       |                                       | 0.25                                | 0.80±0.07             | 0.00±0.00                            | 0.00±0.00                            | 0.00±0.00                            | 0.04±0.04                            | 0.96±0.04                         | 6.70±1.18         | 12.71±3.81                                               | 94.67±9.28               | 118.54±23.08                     |
|                                       |                                       | 1.00                                | 0.82±0.05             | 0.00±0.00                            | 0.00±0.00                            | 0.00±0.00                            | 0.00±0.00                            | 1.00±0.00                         | 8.66±0.82         | 17.87±2.97                                               | 150.33±18.81             | 189.81±32.84                     |
|                                       |                                       | 4.00                                | 0.82±0.07             | 0.00±0.00                            | 0.00±0.00                            | 0.00±0.00                            | 0.07±0.07                            | 0.93±0.07                         | 7.97±0.78         | 19.06±4.86                                               | 89.17±17.53              | 122.57±34.88                     |
|                                       | 150                                   | 0.00                                | 0.92±0.03             | 0.00±0.00                            | 0.00±0.00                            | 0.00±0.00                            | 0.00±0.00                            | 1.00±0.00                         | 11.59±0.60        | 8.73±0.96                                                | 185.00±12.11             | 85.18±16.24                      |
|                                       |                                       | 0.25                                | 0.85±0.02             | 0.00±0.00                            | 0.00±0.00                            | 0.00±0.00                            | 0.06±0.04                            | 0.94±0.04                         | 10.00±0.87        | 7.29±1.24                                                | 106.67±13.88             | 55.92±12.77                      |
|                                       |                                       | 1.00                                | 0.85±0.06             | 0.00±0.00                            | 0.00±0.00                            | 0.00±0.00                            | 0.07±0.05                            | 0.93±0.05                         | 11.00±1.56        | 8.44±1.46                                                | 128.83±13.99             | 56.66±6.12                       |
|                                       |                                       | 4.00                                | 0.92±0.05             | 0.00±0.00                            | 0.00±0.00                            | 0.00±0.00                            | 0.06±0.06                            | 0.94±0.06                         | 9.69±0.83         | 7.62±0.83                                                | 117.50±17.50             | 58.11±8.15                       |
| IR62                                  | 0                                     | 0.00                                | 0.87±0.06             | 0.00±0.00                            | 0.12±0.05                            | 0.23±0.06                            | 0.32±0.06                            | 0.34±0.15                         | 3.65±0.66         | 7.25±1.79                                                | 72.00±8.56               | 76.77±14.13                      |
|                                       |                                       | 0.25                                | 0.65±0.10             | 0.00±0.00                            | 0.03±0.03                            | 0.15±0.10                            | 0.35±0.16                            | 0.48±0.21                         | 2.57±0.75         | 3.75±0.74                                                | 62.83±8.66               | 90.70±14.35                      |
|                                       |                                       | 1.00                                | 0.72±0.09             | 0.03±0.03                            | 0.15±0.10                            | 0.22±0.10                            | 0.30±0.14                            | 0.30±0.15                         | 2.61±0.82         | 3.29±1.11                                                | 87.50±18.53              | 64.53±12.26                      |
|                                       |                                       | 4.00                                | 0.65±0.07             | 0.00±0.00                            | 0.05±0.05                            | 0.35±0.12                            | 0.28±0.08                            | 0.32±0.17                         | 2.08±0.36         | 2.97±0.50                                                | 98.67±11.20              | 122.48±32.01                     |
|                                       | 150                                   | 0.00                                | 0.80±0.05             | 0.00±0.00                            | 0.00±0.00                            | 0.00±0.00                            | 0.26±0.10                            | 0.74±0.10                         | 4.37±0.75         | 3.34±0.44                                                | 74.17±5.97               | 34.43±4.80                       |
|                                       |                                       | 0.25                                | 0.62±0.09             | 0.00±0.00                            | 0.00±0.00                            | 0.04±0.04                            | 0.14±0.10                            | 0.82±0.14                         | 4.80±0.66         | 5.27±1.05                                                | 76.17±7.64               | 62.41±23.62                      |
|                                       |                                       | 1.00                                | 0.60±0.09             | 0.00±0.00                            | 0.00±0.00                            | 0.07±0.07                            | 0.11±0.05                            | 0.83±0.10                         | 2.92±1.00         | 2.60±1.14                                                | 78.00±7.90               | 46.25±5.23                       |
|                                       |                                       | 4.00                                | 0.73±0.07             | 0.00±0.00                            | 0.00±0.00                            | 0.04±0.04                            | 0.17±0.04                            | 0.80±0.05                         | 4.05±0.55         | 3.23±0.45                                                | 73.50±12.64              | 37.62±8.51                       |
| F-Variety (V) <sup>1</sup>            |                                       |                                     | 19.033***             |                                      |                                      |                                      |                                      | 51.236***                         | 185.299***        | 76.132***                                                | 66.329***                | 21.222***                        |
| F-Silicon (S) <sup>1</sup>            |                                       |                                     | 3.508*                |                                      |                                      |                                      |                                      | 0.473ns                           | 1.885ns           | 1.058ns                                                  | 7.718***                 | 0.920ns                          |
| F-Nitrogen (N) <sup>1</sup>           |                                       |                                     | 0.015n                |                                      |                                      |                                      |                                      | 5.907*                            | 17.478***         | 0.340ns                                                  | 0.063ns                  | 49.946***                        |
| S×N <sup>1</sup>                      |                                       |                                     | 0.380ns               |                                      |                                      |                                      |                                      | 0.134ns                           | 1.382ns           | 0.889ns                                                  | 0.904ns                  | 0.804ns                          |
| V×N <sup>1</sup>                      |                                       |                                     | 2.095ns               |                                      |                                      |                                      |                                      | 8.967***                          | 1.473ns           | 11.448***                                                | 0.986ns                  | 7.489**                          |
| V×S <sup>1</sup>                      |                                       |                                     | 1.075ns               |                                      |                                      |                                      |                                      | 1.105ns                           | 0.552ns           | 1.204ns                                                  | 8.979***                 | 4.568***                         |
| V×SN <sup>1</sup>                     |                                       |                                     | 0.093ns               |                                      |                                      |                                      |                                      | 0.489ns                           | 0.302ns           | 0.813ns                                                  | 1.234ns                  | 2.271ns                          |
| Block <sup>1</sup>                    |                                       |                                     | ns                    |                                      |                                      |                                      |                                      | ns                                | ns                | 3.012*                                                   | 2.801*                   | 4.068**                          |
| Covariate (plant weight) <sup>1</sup> |                                       |                                     | ns                    |                                      |                                      |                                      |                                      | ns                                | ns                | 7.059**                                                  | ns                       | ns                               |
| Contrast (S) <sup>1</sup>             |                                       |                                     | (Q)**                 |                                      |                                      |                                      |                                      | ns                                | ns                | ns                                                       | (L)*                     | ns                               |

<sup>1</sup>: ns =  $p > 0.05$ , \* =  $p \leq 0.05$ , \*\* =  $p \leq 0.01$ , \*\*\* =  $p \leq 0.001$ , L = linear contrast, Q = quadratic contrast; <sup>2</sup>: DW = dry weight; degrees of freedom: variety, nitrogen, variety x nitrogen = 1; silicon, variety x silicon, nitrogen x silicon, and variety x nitrogen x silicon interactions = 3; block = 5, covariate = 1; error degrees of freedom = 80, 75 (where ‘block’ is included) or 74 (where ‘block’ and ‘covariate’ are included);

**Table S3.** Results from no-choice experiments conducted with whitebacked planthopper in the Philippines. Numbers are means  $\pm$  SEM.

| Variety                              | Nitrogen<br>(kg ha <sup>-1</sup> ) | Silicon<br>(t ha <sup>-1</sup> ) | Nymph Survival<br>(Proportion) | Nymph Weight (mg<br>DW) <sup>2</sup> | Number of Eggs per<br>Plant | Number of Eggs per<br>g Plant DW <sup>2</sup> |
|--------------------------------------|------------------------------------|----------------------------------|--------------------------------|--------------------------------------|-----------------------------|-----------------------------------------------|
| IR22                                 | 0                                  | 0                                | 0.80 $\pm$ 0.06                | 0.98 $\pm$ 0.11                      | 79.33 $\pm$ 33.40           | 127.65 $\pm$ 52.20                            |
|                                      |                                    | 0.25                             | 0.67 $\pm$ 0.03                | 0.89 $\pm$ 0.21                      | 103.33 $\pm$ 30.60          | 163.54 $\pm$ 46.63                            |
|                                      |                                    | 1                                | 0.93 $\pm$ 0.07                | 1.33 $\pm$ 0.11                      | 54.00 $\pm$ 30.86           | 73.76 $\pm$ 35.40                             |
|                                      |                                    | 4                                | 0.70 $\pm$ 0.06                | 1.14 $\pm$ 0.02                      | 26.00 $\pm$ 19.86           | 26.48 $\pm$ 16.58                             |
|                                      | 150                                | 0                                | 0.90 $\pm$ 0.06                | 2.07 $\pm$ 0.10                      | 100.67 $\pm$ 45.17          | 61.25 $\pm$ 27.29                             |
|                                      |                                    | 0.25                             | 1.00 $\pm$ 0.00                | 2.19 $\pm$ 0.38                      | 95.00 $\pm$ 5.00            | 69.95 $\pm$ 3.36                              |
|                                      |                                    | 1                                | 0.93 $\pm$ 0.07                | 1.51 $\pm$ 0.36                      | 23.33 $\pm$ 12.77           | 16.04 $\pm$ 9.81                              |
|                                      |                                    | 4                                | 0.73 $\pm$ 0.18                | 1.34 $\pm$ 0.34                      | 73.00 $\pm$ 68.39           | 51.60 $\pm$ 44.01                             |
| IR62                                 | 0                                  | 0                                | 0.23 $\pm$ 0.19                | 0.25 $\pm$ 0.18                      | 56.67 $\pm$ 27.43           | 57.34 $\pm$ 26.63                             |
|                                      |                                    | 0.25                             | 0.37 $\pm$ 0.23                | 0.40 $\pm$ 0.21                      | 29.67 $\pm$ 15.30           | 42.40 $\pm$ 15.69                             |
|                                      |                                    | 1                                | 0.30 $\pm$ 0.25                | 0.45 $\pm$ 0.25                      | 13.67 $\pm$ 6.84            | 12.78 $\pm$ 6.40                              |
|                                      |                                    | 4                                | 0.37 $\pm$ 0.18                | 0.20 $\pm$ 0.09                      | 30.67 $\pm$ 21.46           | 63.26 $\pm$ 54.34                             |
|                                      | 150                                | 0                                | 0.30 $\pm$ 0.12                | 0.32 $\pm$ 0.06                      | 18.00 $\pm$ 6.93            | 11.98 $\pm$ 4.48                              |
|                                      |                                    | 0.25                             | 0.43 $\pm$ 0.09                | 0.33 $\pm$ 0.11                      | 23.67 $\pm$ 9.74            | 27.94 $\pm$ 11.04                             |
|                                      |                                    | 1                                | 0.73 $\pm$ 0.18                | 0.59 $\pm$ 0.18                      | 7.67 $\pm$ 7.67             | 5.99 $\pm$ 5.99                               |
|                                      |                                    | 4                                | 0.47 $\pm$ 0.12                | 0.39 $\pm$ 0.12                      | 56.00 $\pm$ 10.00           | 31.70 $\pm$ 10.74                             |
| F-variety(V) <sup>1</sup>            |                                    |                                  | 39.911***                      | 106.655***                           | 10.205***                   | 7.930**                                       |
| F-Silicon (S) <sup>1</sup>           |                                    |                                  | 1.250ns                        | 0.810ns                              | 2.050ns                     | 2.099ns                                       |
| F-Nitrogen (N) <sup>1</sup>          |                                    |                                  | 4.266*                         | 14.120***                            | 0.012ns                     | 5.061*                                        |
| V $\times$ S <sup>1</sup>            |                                    |                                  | 0.718ns                        | 0.660ns                              | 1.169ns                     | 1.983ns                                       |
| V $\times$ N <sup>1</sup>            |                                    |                                  | 0.133ns                        | 8.843**                              | 0.366ns                     | 0.813ns                                       |
| S $\times$ N <sup>1</sup>            |                                    |                                  | 0.320ns                        | 1.435ns                              | 1.041ns                     | 1.174ns                                       |
| V $\times$ S $\times$ N <sup>1</sup> |                                    |                                  | 1.127ns                        | 2.807ns                              | 0.540ns                     | 0.864ns                                       |

<sup>1</sup>: ns =  $p > 0.05$ ; \* =  $p \leq 0.05$ ; \*\* =  $p \leq 0.01$ ; \*\*\* =  $p \leq 0.005$ ; <sup>2</sup>: DW = dry weight; degrees of freedom: variety, nitrogen, variety x nitrogen = 1; silicon, variety x silicon, nitrogen x silicon, and variety x nitrogen x silicon interactions = 3, error = 80

**Table S4.** Results from choice and no-choice experiments conducted with green leafhopper in the Philippines. Numbers are means  $\pm$  SEM.

| Variety                     | Nitrogen<br>(kg ha <sup>-1</sup> ) | Silicon<br>(t ha <sup>-1</sup> ) | Nymph Survival<br>(Proportion) | Nymph Weight<br>(mg DW) <sup>2</sup> | Nymphs per Plant<br>(Number Settling) | Nymph Settling<br>(Proportion) |
|-----------------------------|------------------------------------|----------------------------------|--------------------------------|--------------------------------------|---------------------------------------|--------------------------------|
| IR22                        | 0                                  | 0                                | 0.67±0.07                      | 3.41±0.29                            | 10.67±1.31                            | 0.10±0.01                      |
|                             |                                    | 0.25                             | 0.70±0.10                      | 3.80±0.91                            | 11.33±1.48                            | 0.10±0.01                      |
|                             |                                    | 1                                | 0.77±0.09                      | 2.87±0.75                            | 11.67±0.99                            | 0.11±0.01                      |
|                             |                                    | 4                                | 0.67±0.12                      | 3.27±0.41                            | 10.67±0.80                            | 0.10±0.01                      |
|                             | 150                                | 0                                | 0.67±0.09                      | 5.46±0.64                            | 10.50±2.36                            | 0.09±0.02                      |
|                             |                                    | 0.25                             | 0.87±0.07                      | 5.73±0.61                            | 16.33±1.78                            | 0.15±0.01                      |
|                             |                                    | 1                                | 0.83±0.09                      | 5.30±0.86                            | 15.00±2.44                            | 0.13±0.02                      |
|                             |                                    | 4                                | 0.93±0.03                      | 6.03±0.27                            | 8.67±3.01                             | 0.08±0.03                      |
| IR62                        | 0                                  | 0                                | 0.03±0.03                      | 0.26±0.26                            | 0.83±0.40                             | 0.01±0.00                      |
|                             |                                    | 0.25                             | 0.07±0.07                      | 0.09±0.05                            | 2.50±0.89                             | 0.02±0.01                      |
|                             |                                    | 1                                | 0.07±0.03                      | 0.09±0.03                            | 2.17±0.98                             | 0.02±0.01                      |
|                             |                                    | 4                                | 0.07±0.07                      | 0.05±0.03                            | 1.33±0.95                             | 0.01±0.01                      |
|                             | 150                                | 0                                | 0.43±0.24                      | 1.19±0.50                            | 0.83±0.31                             | 0.01±0.00                      |
|                             |                                    | 0.25                             | 0.03±0.03                      | 0.23±0.13                            | 0.67±0.33                             | 0.01±0.00                      |
|                             |                                    | 1                                | 0.03±0.03                      | 0.05±0.03                            | 2.50±1.15                             | 0.02±0.01                      |
|                             |                                    | 4                                | 0.07±0.03                      | 0.05±0.03                            | 4.50±1.48                             | 0.04±0.01                      |
| F-Variety (V) <sup>1</sup>  |                                    |                                  | 241.231***                     | 319.145***                           | 176.680***                            | 209.832***                     |
| F-Silicon (S) <sup>1</sup>  |                                    |                                  | 1.254ns                        | 0.833ns                              | 1.976ns                               | 0.940ns                        |
| F-Nitrogen (N) <sup>1</sup> |                                    |                                  | 6.701**                        | 28.927***                            | 1.715ns                               | 0.201ns                        |
| V×S <sup>1</sup>            |                                    |                                  | 0.752ns                        | 0.883ns                              | 2.486ns                               | 3.246*                         |
| V×N <sup>1</sup>            |                                    |                                  | 0.547ns                        | 18.513***                            | 0.566ns                               | 0.007ns                        |
| S×N <sup>1</sup>            |                                    |                                  | 1.254ns                        | 0.176ns                              | 0.355ns                               | 0.178ns                        |
| V×S×N <sup>1</sup>          |                                    |                                  | 1.983ns                        | 0.595ns                              | 2.883*                                | 4.956***                       |

<sup>1</sup>: ns =  $p > 0.05$ ; \* =  $p \leq 0.05$ ; \*\* =  $p \leq 0.01$ ; \*\*\* =  $p \leq 0.005$ ; <sup>2</sup>: DW = dry weight; degrees of freedom: variety, nitrogen, variety  $\times$  nitrogen = 1; silicon, variety  $\times$  silicon, nitrogen  $\times$  silicon, and variety  $\times$  nitrogen  $\times$  silicon interactions = 3, error = 80

**Table S5.** Results from choice experiments conducted with brown planthopper in the Philippines. Numbers are means  $\pm$  SEM.

| Variety                     | Nitrogen<br>(kg ha <sup>-1</sup> ) | Silicon<br>(Kg ha <sup>-1</sup> ) | Nymphs per<br>Plant (Number<br>Settling) | Nymph Settling<br>(Proportion) | Infested Plant<br>Biomass (g DW) | Eggs per Plant | Eggs per Plant<br>(Proportion) |
|-----------------------------|------------------------------------|-----------------------------------|------------------------------------------|--------------------------------|----------------------------------|----------------|--------------------------------|
| 2                           |                                    |                                   |                                          |                                |                                  |                |                                |
| IR22                        | 0                                  | 0                                 | 14.50±1.89                               | 0.14±0.02                      | 0.05±0.00                        | 168.00±22.57   | 0.12±0.02                      |
|                             |                                    | 0.25                              | 8.67±1.91                                | 0.07±0.01                      | 0.04±0.00                        | 48.50±4.65     | 0.03±0.00                      |
|                             |                                    | 1                                 | 8.83±3.15                                | 0.08±0.03                      | 0.02±0.00                        | 42.83±11.12    | 0.03±0.01                      |
|                             |                                    | 4                                 | 7.17±1.94                                | 0.06±0.01                      | 0.04±0.01                        | 112.50±26.92   | 0.08±0.02                      |
|                             | 150                                | 0                                 | 10.33±2.60                               | 0.10±0.03                      | 0.07±0.01                        | 217.17±24.14   | 0.15±0.02                      |
|                             |                                    | 0.25                              | 9.83±1.85                                | 0.09±0.01                      | 0.04±0.01                        | 50.00±11.89    | 0.03±0.01                      |
|                             |                                    | 1                                 | 7.17±2.74                                | 0.06±0.02                      | 0.03±0.01                        | 65.67±10.24    | 0.04±0.01                      |
|                             |                                    | 4                                 | 8.50±1.50                                | 0.07±0.01                      | 0.03±0.00                        | 71.50±23.31    | 0.05±0.01                      |
| IR62                        | 0                                  | 0                                 | 4.17±1.17                                | 0.04±0.01                      | 0.08±0.00                        | 90.17±38.18    | 0.06±0.03                      |
|                             |                                    | 0.25                              | 3.67±1.56                                | 0.03±0.01                      | 0.05±0.00                        | 59.33±21.83    | 0.04±0.02                      |
|                             |                                    | 1                                 | 1.83±1.14                                | 0.01±0.01                      | 0.05±0.00                        | 63.50±16.51    | 0.04±0.01                      |
|                             |                                    | 4                                 | 1.00±0.63                                | 0.01±0.00                      | 0.07±0.00                        | 72.00±24.26    | 0.05±0.02                      |
|                             | 150                                | 0                                 | 7.33±1.58                                | 0.06±0.01                      | 0.09±0.01                        | 219.33±91.45   | 0.14±0.04                      |
|                             |                                    | 0.25                              | 8.17±0.79                                | 0.08±0.01                      | 0.08±0.02                        | 61.83±12.71    | 0.04±0.01                      |
|                             |                                    | 1                                 | 4.17±0.54                                | 0.04±0.00                      | 0.07±0.00                        | 60.83±13.68    | 0.04±0.01                      |
|                             |                                    | 4                                 | 7.00±1.15                                | 0.06±0.01                      | 0.07±0.00                        | 77.50±21.02    | 0.05±0.01                      |
| F-variety (V) <sup>1</sup>  |                                    |                                   | 9.739***                                 |                                | 21.547***                        | 0.010ns        | 0.111ns                        |
| F-Silicon (S) <sup>1</sup>  |                                    |                                   | 10.722***                                |                                | 42.819***                        | 10.513***      | 11.041***                      |
| F-Nitrogen (N) <sup>1</sup> |                                    |                                   | 5.073*                                   |                                | 11.107***                        | 2.217ns        | 1.782ns                        |
| V×S <sup>1</sup>            |                                    |                                   | 0.309ns                                  |                                | 13.232***                        | 1.701ns        | 1.644ns                        |
| V×N <sup>1</sup>            |                                    |                                   | 0.498ns                                  |                                | 0.694ns                          | 0.143ns        | 0.148ns                        |
| S×N <sup>1</sup>            |                                    |                                   | 4.266**                                  |                                | 6.183***                         | 1.227ns        | 1.409ns                        |
| V×S×N <sup>1</sup>          |                                    |                                   | 0.217ns                                  |                                | 2.713*                           | 0.607ns        | 0.700ns                        |
| Contrast (S) <sup>1</sup>   |                                    |                                   | (L)***                                   |                                | (L)***                           | (L)***         | (L)***                         |

<sup>1</sup>: ns =  $p > 0.05$ , \* =  $p \leq 0.05$ , \*\* =  $p \leq 0.01$ , \*\*\* =  $p \leq 0.005$ , L = linear contrast; <sup>2</sup>: DW = dry weight; ; degrees of freedom: variety, nitrogen, variety x nitrogen = 1; silicon, variety x silicon, nitrogen x silicon, and variety x nitrogen x silicon interactions = 3, error = 80

**Table S6.** Results from choice experiments conducted with whitebacked planthopper in the Philippines. Numbers are means  $\pm$  SEM.

| Variety                    | Nitrogen<br>(kg ha <sup>-1</sup> ) | Silicon<br>(Kg ha <sup>-1</sup> ) | Nymphs per Plant<br>(Number Settling) | Nymph Settling<br>(Proportion) | Eggs per Plant | Eggs per plant<br>(Proportion) |
|----------------------------|------------------------------------|-----------------------------------|---------------------------------------|--------------------------------|----------------|--------------------------------|
| IR22                       | 0                                  | 0                                 | 5.17±0.65                             | 0.06±0.01                      | 85.00±43.11    | 0.10±0.05                      |
|                            |                                    | 0.25                              | 7.33±1.28                             | 0.08±0.02                      | 16.33±9.49     | 0.06±0.05                      |
|                            |                                    | 1                                 | 6.38±1.73                             | 0.07±0.02                      | 64.67±53.12    | 0.07±0.06                      |
|                            |                                    | 4                                 | 8.67±2.08                             | 0.09±0.02                      | 13.33±13.33    | 0.01±0.01                      |
|                            | 150                                | 0                                 | 8.67±1.61                             | 0.10±0.02                      | 31.67±24.55    | 0.04±0.03                      |
|                            |                                    | 0.25                              | 15.33±3.70                            | 0.17±0.04                      | 120.00±75.06   | 0.19±0.08                      |
|                            |                                    | 1                                 | 11.33±3.24                            | 0.13±0.04                      | 66.00±6.66     | 0.14±0.06                      |
|                            |                                    | 4                                 | 7.67±1.09                             | 0.08±0.01                      | 58.33±8.82     | 0.12±0.05                      |
| IR62                       | 0                                  | 0                                 | 2.33±0.80                             | 0.03±0.01                      | 3.33±3.33      | 0.00±0.00                      |
|                            |                                    | 0.25                              | 0.67±0.33                             | 0.01±0.00                      | 16.67±12.02    | 0.02±0.01                      |
|                            |                                    | 1                                 | 0.67±0.33                             | 0.01±0.00                      | 11.00±7.37     | 0.02±0.01                      |
|                            |                                    | 4                                 | 1.33±0.49                             | 0.02±0.01                      | 10.00±10.00    | 0.01±0.01                      |
|                            | 150                                | 0                                 | 4.17±0.83                             | 0.05±0.01                      | 55.00±35.00    | 0.06±0.04                      |
|                            |                                    | 0.25                              | 4.83±1.01                             | 0.06±0.01                      | 61.67±41.77    | 0.11±0.05                      |
|                            |                                    | 1                                 | 3.50±0.85                             | 0.04±0.01                      | 18.33±11.67    | 0.02±0.01                      |
|                            |                                    | 4                                 | 2.67±0.33                             | 0.03±0.01                      | 15.00±15.00    | 0.02±0.02                      |
| F-variety(V) <sup>1</sup>  |                                    |                                   |                                       | 133.239***                     | 9.606***       |                                |
| F-Silicon(S) <sup>1</sup>  |                                    |                                   |                                       | 0.928ns                        | 1.079ns        |                                |
| F-Nitrogen(N) <sup>1</sup> |                                    |                                   |                                       | 29.043***                      | 8.908***       |                                |
| V×S <sup>1</sup>           |                                    |                                   |                                       | 0.888ns                        | 0.334ns        |                                |
| V×N <sup>1</sup>           |                                    |                                   |                                       | 2.452ns                        | 0.247ns        |                                |
| S×N <sup>1</sup>           |                                    |                                   |                                       | 1.371ns                        | 1.014ns        |                                |
| V×S×N <sup>1</sup>         |                                    |                                   |                                       | 0.299ns                        | 2.486ns        |                                |

<sup>1</sup>: ns =  $p > 0.05$ , \*\*\* =  $p \leq 0.005$ ; degrees of freedom: variety, nitrogen, variety x nitrogen = 1; silicon, variety x silicon, nitrogen x silicon, and variety x nitrogen x silicon interactions = 3, error = 80

**Table S7.** Results from no-choice experiments conducted with brown planthopper in Vietnam. Numbers are means  $\pm$  SEM.

| Silicon (t<br>ha <sup>-1</sup> )                | 4 <sup>th</sup> Instars<br>(Proportion) | 5 <sup>th</sup> Instars<br>(Proportion) | Developme<br>nt to Adult<br>(Proportion) | Females<br>(Proportion) | Nymph<br>Survival<br>(Proportion) | Nymph<br>Weight<br>(mg DW) <sup>2</sup> | Infested<br>Plant<br>Height<br>(cm) | Infested<br>Plant<br>Weight<br>(g DW) <sup>2</sup> | Control<br>Plant<br>Height<br>(cm) | Control<br>Plant<br>Weight<br>(g DW) <sup>2</sup> | Nymph<br>Weight per<br>Plant (mg g-<br>DW <sup>-1</sup> ) <sup>2</sup> | Eggs per<br>Plant | Eggs<br>Inserted to<br>Midrib<br>(Proportion) | Adult<br>Survival<br>(Proportion) |
|-------------------------------------------------|-----------------------------------------|-----------------------------------------|------------------------------------------|-------------------------|-----------------------------------|-----------------------------------------|-------------------------------------|----------------------------------------------------|------------------------------------|---------------------------------------------------|------------------------------------------------------------------------|-------------------|-----------------------------------------------|-----------------------------------|
| 0                                               | 0.04 $\pm$ 0.03                         | 0.43 $\pm$ 0.09                         | 0.53 $\pm$ 0.10                          | 0.44 $\pm$ 0.13         | 0.68 $\pm$ 0.14                   | 2.06 $\pm$ 0.57                         | 49.33 $\pm$ 2.01                    | 0.73 $\pm$ 0.07                                    | 52.33 $\pm$ 2.55                   | 0.90 $\pm$ 0.10                                   | 2.87 $\pm$ 0.72                                                        | 30.50 $\pm$ 11.92 | 0.39 $\pm$ 0.14                               | 0.67 $\pm$ 0.21                   |
| 0.25                                            | 0.09 $\pm$ 0.04                         | 0.63 $\pm$ 0.10                         | 0.28 $\pm$ 0.10                          | 0.29 $\pm$ 0.14         | 0.43 $\pm$ 0.08                   | 1.23 $\pm$ 0.25                         | 52.67 $\pm$ 2.30                    | 1.00 $\pm$ 0.15                                    | 51.83 $\pm$ 3.15                   | 0.97 $\pm$ 0.19                                   | 1.47 $\pm$ 0.39                                                        | 89.83 $\pm$ 29.37 | 0.18 $\pm$ 0.08                               | 1.00 $\pm$ 0.00                   |
| 1                                               | 0.09 $\pm$ 0.04                         | 0.53 $\pm$ 0.12                         | 0.37 $\pm$ 0.14                          | 0.56 $\pm$ 0.12         | 0.62 $\pm$ 0.06                   | 1.93 $\pm$ 0.24                         | 54.83 $\pm$ 1.85                    | 1.05 $\pm$ 0.08                                    | 51.33 $\pm$ 2.96                   | 0.89 $\pm$ 0.18                                   | 1.89 $\pm$ 0.31                                                        | 31.33 $\pm$ 13.50 | 0.16 $\pm$ 0.06                               | 0.50 $\pm$ 0.22                   |
| 4                                               | 0.03 $\pm$ 0.03                         | 0.51 $\pm$ 0.06                         | 0.47 $\pm$ 0.07                          | 0.54 $\pm$ 0.10         | 0.57 $\pm$ 0.10                   | 1.80 $\pm$ 0.32                         | 51.67 $\pm$ 2.70                    | 0.92 $\pm$ 0.15                                    | 50.33 $\pm$ 2.30                   | 0.88 $\pm$ 0.23                                   | 2.07 $\pm$ 0.49                                                        | 50.50 $\pm$ 12.96 | 0.37 $\pm$ 0.10                               | 0.00 $\pm$ 0.00                   |
| F-Silicon <sup>1</sup><br>Contrast <sup>1</sup> |                                         |                                         | 1.211ns                                  | 0.693ns                 | 1.136ns                           | 0.976ns                                 | 1.037ns                             | 1.452ns                                            | 0.096ns                            | 0.125ns                                           | 1.367ns                                                                | 2.277ns           | 0.896ns                                       | 5.901***<br>(L)**                 |

<sup>1</sup>: ns =  $p > 0.05$ , \*\* =  $p \leq 0.01$ , \*\*\* =  $p \leq 0.005$ , L = linear contrast; <sup>2</sup>: DW = dry weight; degrees of freedom: silicon = 3, error = 20



**Table S8.** Results from choice experiments conducted with brown planthopper in Vietnam. Numbers are means  $\pm$  SEM.

| Silicon (t ha <sup>-1</sup> ) | Eggs per Plant (Proportion) | Plant Weight (g DW) <sup>2</sup> | Eggs per g Plant DW <sup>2</sup> |
|-------------------------------|-----------------------------|----------------------------------|----------------------------------|
| 0                             | 0.41 $\pm$ 0.04             | 0.49 $\pm$ 0.13                  | 256.77 $\pm$ 68.43               |
| 0.25                          | 0.28 $\pm$ 0.04             | 0.49 $\pm$ 0.12                  | 170.61 $\pm$ 68.43               |
| 1                             | 0.17 $\pm$ 0.02             | 0.42 $\pm$ 0.06                  | 121.01 $\pm$ 68.43               |
| 4                             | 0.14 $\pm$ 0.07             | 0.36 $\pm$ 0.03                  | 70.90 $\pm$ 68.43                |
| F-Silicon <sup>1</sup>        | 13.333***                   | 0.442ns                          | 7.967***                         |
| Contrast <sup>1</sup>         | (L)***                      |                                  | (L)****                          |

<sup>1</sup>: ns =  $p > 0.05$ , \*\* =  $p \leq 0.01$ , \*\*\* =  $p \leq 0.005$ , L = linear contrast; <sup>2</sup>: DW = dry weight; degrees of freedom: silicon = 3, error = 20

**Table S9.** Results from experiments with blast disease conducted in the Philippines. Numbers are means  $\pm$  SEM.

| Rice Genotype               | Silicon (t ha <sup>-1</sup> ) | SES Score <sup>2</sup> |
|-----------------------------|-------------------------------|------------------------|
| CO39                        | 0                             | 4.33 $\pm$ 0.33dB      |
| CO39                        | 0.25                          | 4.33 $\pm$ 0.33AB      |
| CO39                        | 1                             | 4.33 $\pm$ 0.33A       |
| CO39                        | 4                             | 3.67 $\pm$ 0.33A       |
| LTH                         | 0                             | 4.67 $\pm$ 0.33d       |
| LTH                         | 0.25                          | 5.00 $\pm$ 0.00        |
| LTH                         | 1                             | 5.00 $\pm$ 0.00        |
| LTH                         | 4                             | 4.67 $\pm$ 0.33        |
| IR22                        | 0                             | 4.00 $\pm$ 0.00c       |
| IR22                        | 0.25                          | 2.33 $\pm$ 0.33        |
| IR22                        | 1                             | 2.67 $\pm$ 0.33        |
| IR22                        | 4                             | 2.67 $\pm$ 0.33        |
| IR24                        | 0                             | 4.00 $\pm$ 0.00c       |
| IR24                        | 0.25                          | 3.00 $\pm$ 0.58        |
| IR24                        | 1                             | 3.00 $\pm$ 0.58        |
| IR24                        | 4                             | 2.67 $\pm$ 0.67        |
| IRBLZ5-Ca                   | 0                             | 2.00 $\pm$ 0.00b       |
| IRBLZ5-Ca                   | 0.25                          | 2.00 $\pm$ 0.00        |
| IRBLZ5-Ca                   | 1                             | 1.00 $\pm$ 0.58        |
| IRBLZ5-Ca                   | 4                             | 1.67 $\pm$ 0.33        |
| IRBL9-W                     | 0                             | 1.00 $\pm$ 0.00a       |
| IRBL9-W                     | 0.25                          | 1.00 $\pm$ 0.00        |
| IRBL9-W                     | 1                             | 0.33 $\pm$ 0.33        |
| IRBL9-W                     | 4                             | 0.67 $\pm$ 0.33        |
| IRBLZ-Fu                    | 0                             | 0.67 $\pm$ 0.33a       |
| IRBLZ-Fu                    | 0.25                          | 0.67 $\pm$ 0.33        |
| IRBLZ-Fu                    | 1                             | 0.00 $\pm$ 0.00        |
| IRBLZ-Fu                    | 4                             | 0.67 $\pm$ 0.33        |
| F-Silicon (S) <sup>1</sup>  |                               | 5.048***               |
| F-Genotype (G) <sup>1</sup> |                               | 99.369***              |
| S $\times$ G <sup>1</sup>   |                               | 0.451ns                |
| Contrast (S) <sup>1</sup>   |                               | (L)***                 |

<sup>1</sup>: ns =  $p > 0.05$ , \*\*\* =  $p > 0.001$ , L = linear contrast; <sup>2</sup>: SES = Standard Evaluation System, uppercase letters indicate homogenous silicon groups, lowercase letters indicate homogenous variety groups; degrees of freedom: genotype = 6, silicon = 3, interaction = 18, error = 56

**Table S10.** Results from experiments with bacterial blight disease conducted in the Philippines. Numbers are means  $\pm$  SEM.

| Genotypes | Silicon (t ha <sup>-1</sup> ) | PXO99 Lesion Length (mm) at 32 DAS <sup>1</sup> | PXO99 Plant Weight (g DW) at 32 DAS <sup>1</sup> | PXO145 Lesion Length (mm) at 32 DAS <sup>1</sup> | PXO145 Plant Weight (g DW) at 32 DAS <sup>1</sup> | PXO99 Lesion Length (mm) at 59 DAS <sup>1</sup> | PXO99 Plant Weight (g DW) at 59 DAS <sup>1</sup> | PXO145 Lesion Length (mm) at 59 DAS <sup>1</sup> | PXO145 Plant Weight (g DW) at 59 DAS <sup>1</sup> |
|-----------|-------------------------------|-------------------------------------------------|--------------------------------------------------|--------------------------------------------------|---------------------------------------------------|-------------------------------------------------|--------------------------------------------------|--------------------------------------------------|---------------------------------------------------|
| BB4       | 0                             | 7.86 $\pm$ 1.87                                 | 0.74 $\pm$ 0.11                                  | 1.79 $\pm$ 0.68                                  | 1.34 $\pm$ 0.06                                   | 19.30 $\pm$ 3.29                                | 6.40 $\pm$ 0.92                                  | 3.48 $\pm$ 0.67                                  | 11.99 $\pm$ 1.43                                  |
|           | 0.25                          | 5.31 $\pm$ 0.80                                 | 0.96 $\pm$ 0.15                                  | 1.24 $\pm$ 0.22                                  | 1.16 $\pm$ 0.18                                   | 8.56 $\pm$ 0.88                                 | 8.88 $\pm$ 0.89                                  | 2.93 $\pm$ 0.56                                  | 10.61 $\pm$ 0.77                                  |
|           | 1                             | 6.39 $\pm$ 1.07                                 | 1.13 $\pm$ 0.08                                  | 1.77 $\pm$ 0.17                                  | 1.56 $\pm$ 0.09                                   | 9.16 $\pm$ 1.26                                 | 9.09 $\pm$ 0.93                                  | 3.04 $\pm$ 0.82                                  | 11.90 $\pm$ 1.13                                  |
|           | 4                             | 7.03 $\pm$ 1.50                                 | 0.97 $\pm$ 0.09                                  | 3.01 $\pm$ 0.71                                  | 1.63 $\pm$ 0.39                                   | 10.97 $\pm$ 0.94                                | 9.01 $\pm$ 1.47                                  | 3.03 $\pm$ 0.35                                  | 14.21 $\pm$ 0.57                                  |
| BB67      | 0                             | 9.05 $\pm$ 0.81                                 | 0.60 $\pm$ 0.05                                  | 0.86 $\pm$ 0.22                                  | 1.36 $\pm$ 0.20                                   | 20.82 $\pm$ 2.24                                | 7.27 $\pm$ 0.97                                  | 1.64 $\pm$ 0.27                                  | 9.45 $\pm$ 0.96                                   |
|           | 0.25                          | 10.94 $\pm$ 1.06                                | 0.63 $\pm$ 0.08                                  | 1.05 $\pm$ 0.12                                  | 1.17 $\pm$ 0.10                                   | 18.90 $\pm$ 2.16                                | 6.71 $\pm$ 1.05                                  | 1.58 $\pm$ 0.27                                  | 10.31 $\pm$ 1.34                                  |
|           | 1                             | 10.02 $\pm$ 1.52                                | 0.95 $\pm$ 0.14                                  | 1.37 $\pm$ 0.27                                  | 1.48 $\pm$ 0.19                                   | 15.51 $\pm$ 2.34                                | 9.03 $\pm$ 0.97                                  | 4.61 $\pm$ 2.10                                  | 10.19 $\pm$ 1.59                                  |
|           | 4                             | 9.04 $\pm$ 0.40                                 | 0.70 $\pm$ 0.11                                  | 0.68 $\pm$ 0.19                                  | 1.14 $\pm$ 0.16                                   | 23.65 $\pm$ 3.11                                | 5.95 $\pm$ 0.67                                  | 5.84 $\pm$ 2.62                                  | 9.96 $\pm$ 1.05                                   |
| BB7       | 0                             | 9.97 $\pm$ 1.36                                 | 0.93 $\pm$ 0.17                                  | 3.33 $\pm$ 1.02                                  | 1.42 $\pm$ 0.22                                   | 30.93 $\pm$ 1.26                                | 4.05 $\pm$ 0.70                                  | 5.69 $\pm$ 0.70                                  | 10.02 $\pm$ 0.71                                  |
|           | 0.25                          | 8.18 $\pm$ 1.48                                 | 0.64 $\pm$ 0.05                                  | 3.11 $\pm$ 1.05                                  | 1.22 $\pm$ 0.12                                   | 24.79 $\pm$ 3.07                                | 5.53 $\pm$ 0.82                                  | 6.95 $\pm$ 2.95                                  | 9.84 $\pm$ 1.19                                   |
|           | 1                             | 9.93 $\pm$ 1.28                                 | 0.89 $\pm$ 0.19                                  | 3.99 $\pm$ 1.41                                  | 1.52 $\pm$ 0.19                                   | 29.10 $\pm$ 2.09                                | 4.70 $\pm$ 0.82                                  | 4.94 $\pm$ 0.80                                  | 9.81 $\pm$ 1.12                                   |
|           | 4                             | 10.16 $\pm$ 0.95                                | 0.79 $\pm$ 0.13                                  | 3.83 $\pm$ 1.04                                  | 1.62 $\pm$ 0.30                                   | 26.35 $\pm$ 2.17                                | 6.95 $\pm$ 0.95                                  | 5.63 $\pm$ 1.19                                  | 13.11 $\pm$ 1.50                                  |
| IR22      | 0                             | 9.20 $\pm$ 1.73                                 | 0.63 $\pm$ 0.08                                  | 1.54 $\pm$ 0.33                                  | 1.39 $\pm$ 0.07                                   | 31.21 $\pm$ 1.59                                | 5.18 $\pm$ 0.91                                  | 10.47 $\pm$ 1.62                                 | 11.72 $\pm$ 0.93                                  |
|           | 0.25                          | 9.69 $\pm$ 1.31                                 | 0.79 $\pm$ 0.17                                  | 2.32 $\pm$ 0.28                                  | 1.20 $\pm$ 0.07                                   | 25.06 $\pm$ 2.49                                | 2.73 $\pm$ 0.39                                  | 10.23 $\pm$ 0.80                                 | 8.68 $\pm$ 1.82                                   |
|           | 1                             | 9.68 $\pm$ 1.07                                 | 0.87 $\pm$ 0.10                                  | 2.29 $\pm$ 0.17                                  | 1.72 $\pm$ 0.19                                   | 25.12 $\pm$ 3.52                                | 3.61 $\pm$ 0.38                                  | 9.09 $\pm$ 1.97                                  | 11.89 $\pm$ 1.08                                  |
|           | 4                             | 9.30 $\pm$ 0.94                                 | 1.06 $\pm$ 0.04                                  | 2.53 $\pm$ 0.40                                  | 1.84 $\pm$ 0.21                                   | 24.58 $\pm$ 2.17                                | 4.37 $\pm$ 0.44                                  | 9.80 $\pm$ 1.61                                  | 12.49 $\pm$ 1.18                                  |
| IR24      | 0                             | 10.26 $\pm$ 0.53                                | 0.91 $\pm$ 0.13                                  | 8.26 $\pm$ 1.18                                  | 1.24 $\pm$ 0.15                                   | 29.74 $\pm$ 1.99                                | 5.19 $\pm$ 0.66                                  | 20.75 $\pm$ 1.76                                 | 12.88 $\pm$ 1.44                                  |
|           | 0.25                          | 11.27 $\pm$ 1.60                                | 1.20 $\pm$ 0.16                                  | 10.41 $\pm$ 1.12                                 | 1.35 $\pm$ 0.22                                   | 30.30 $\pm$ 1.25                                | 4.42 $\pm$ 0.45                                  | 25.21 $\pm$ 1.55                                 | 11.27 $\pm$ 1.02                                  |
|           | 1                             | 9.24 $\pm$ 0.96                                 | 0.88 $\pm$ 0.16                                  | 9.97 $\pm$ 0.98                                  | 1.23 $\pm$ 0.20                                   | 29.08 $\pm$ 3.18                                | 6.62 $\pm$ 0.85                                  | 25.49 $\pm$ 1.39                                 | 12.21 $\pm$ 1.01                                  |
|           | 4                             | 9.06 $\pm$ 1.05                                 | 0.93 $\pm$ 0.20                                  | 9.30 $\pm$ 0.61                                  | 1.17 $\pm$ 0.20                                   | 27.55 $\pm$ 3.11                                | 4.40 $\pm$ 0.84                                  | 25.57 $\pm$ 0.77                                 | 11.22 $\pm$ 1.26                                  |

<sup>1</sup>: DAS = days after sowing; DW = dry weight

**Table S11.** Results of repeated measures ANOVA for the bacterial blight experiment (see means in Table S10).

| <b>Within-Subject Effects</b>            | <b>DF</b> | <b>F-Lesion</b> | <b>P-Value</b> | <b>F-Weight</b> | <b>P-Value</b> |
|------------------------------------------|-----------|-----------------|----------------|-----------------|----------------|
| Plant age                                | 1         | 747.102         | 0.001          | 2030.165        | 0.001          |
| Plant age × BB type                      | 1         | 133.308         | 0.001          | 205.681         | 0.001          |
| Plant age × genotype                     | 4         | 44.361          | 0.001          | 8.373           | 0.001          |
| Plant age × silicon                      | 3         | 1.940           | 0.124          | 2.254           | 0.083          |
| Plant age × BB type × genotype           | 4         | 8.995           | 0.001          | 7.452           | 0.001          |
| Plant age × BB type × silicon            | 3         | 2.858           | 0.038          | 1.348           | 0.260          |
| Plant age × genotype × silicon           | 12        | 1.248           | 0.253          | 1.652           | 0.080          |
| Plant age × BB type × genotype × silicon | 12        | 0.457           | 0.938          | 0.461           | 0.935          |
| Error                                    | 200       |                 |                |                 |                |
| <b>Between Subject Effects</b>           |           |                 |                |                 |                |
| BB type                                  | 1         | 820.027         | 0.001          | 316.031         | 0.001          |
| Genotype                                 | 1         | 152.053         | 0.001          | 8.765           | 0.001          |
| Silicon                                  | 4         | 1.512           | 0.212          | 4.231           | 0.006          |
| BB type × genotype                       | 3         | 39.687          | 0.001          | 7.676           | 0.001          |
| BB type × silicon                        | 4         | 6.014           | 0.001          | 1.971           | 0.120          |
| Genotype × silicon                       | 3         | 1.910           | 0.035          | 2.005           | 0.025          |
| BB type × genotype × silicon             | 12        | 0.937           | 0.511          | 0.576           | 0.860          |
| Error                                    | 200       |                 |                |                 |                |
